# Supplementary material
Source: publisher figshare collection journal article supplement (https://acs.figshare.com/ndownloader/files/5304670)

1    **Cover sheet of SI**

2    **Continuous In-Stream Assimilatory Nitrate Uptake from High Frequency Sensor Measurements**

3    Michael Rode, Susanne Halbedel (née Angelstein), Muhammad Rehan Anis, Dietrich Borchardt,  
4    Markus Weitere

5    Number of pages: 7

6    Number of figures: 3

7    Number of tables: 3

8

## 10 SUPPLEMENT MATERIAL

## 11 Sampling and analytical methods of nutrients

12 Filtered (0.45 µm) water samples from the stream sites at gauge station Meisdorf and Hausneindorf  
13 were collected approximately every two weeks throughout the duration of the study. All samples  
14 were filtered preserved with sulphoric acid in the field. stored at 4 °C and analyzed within 24 hours at  
15 UFZ in Magdeburg. Nitrite ( $\text{NO}_2^-$ ) and nitrate ( $\text{NO}_3^-$ ) were photometrically determined using the  
16 segmented flow technique (DIN EN ISO 13395. 1996). Total (TP) and reactive phosphorus (SRP) were  
17 measured using the ammonium molybdate spectrometric method (DIN EN ISO 6878. 2004).  
18 Determination of dissolved  $\text{NH}_4^+$  was conducted using ion chromatography method (DIN EN ISO  
19 14911. 1999). Suspended sediments were determined gravimetrically according (DIN 38409 H2.  
20 1987).

21

## 22 References

23 DIN EN ISO 13395 (1996) Water quality- determination of nitrite nitrogen and nitrate nitrogen and  
24 the sum of both by flow analysis (CFA and FIA) and spectrometric detection. Beuth. Berlin.

25 DIN EN ISO 14911 (1999) Water quality- determination of dissolved  $\text{Li}^+$ .  $\text{Na}^+$ .  $\text{NH}_4^+$ .  $\text{K}^+$ .  $\text{Mn}^{2+}$ .  $\text{Ca}^{2+}$ .  $\text{Mg}^{2+}$ .  
26  $\text{Sr}^{2+}$  and  $\text{Ba}^{2+}$  using ion chromatography-method for water and waste water. Beuth. Berlin.

27 DIN EN ISO 6878 (2004) Water quality determination of Phosphorus-ammonium molybdate  
28 spectrometric method. Beuth. Berlin.

29 DIN 38409 (1987) Determination of suspended particulate matter. Beuth. Berlin.

30

31

32 **S2**

33 Table S1: Geomorphic characteristics of the Selke river network derived from the 75m resolution  
34 river network

| Stream<br>order | Mean area<br>(km <sup>2</sup> ) | Stream<br>length<br>(km) | Mean<br>length<br>(km) | Mean<br>direct<br>drainage<br>(km <sup>2</sup> ) | Numbers | Direct Drain<br>to Order<br>(Proportion) |
|-----------------|---------------------------------|--------------------------|------------------------|--------------------------------------------------|---------|------------------------------------------|
| 1               | 0.95                            | 168                      | 0.74                   | 0.95                                             | 226     | 0.50                                     |
| 2               | 5.22                            | 114                      | 1.99                   | 1.48                                             | 57      | 0.19                                     |
| 3               | 23.9                            | 41.4                     | 2.96                   | 2.71                                             | 14      | 0.09                                     |
| 4               | 224                             | 68.4                     | 34.2                   | 42.8                                             | 2       | 0.20                                     |
| 5               | 446                             | 3.15                     | 3.15                   | 6.76                                             | 1       | 0.02                                     |

35

36

37 **S3**

38 Table S2: Land use and discharge of the Selke watershed

| Watershed                                 | Size            | Land use (%) |           |        |       | Mean areal<br>discharge            |
|-------------------------------------------|-----------------|--------------|-----------|--------|-------|------------------------------------|
|                                           | km <sup>2</sup> | arable       | grassland | forest | urban | l s <sup>-1</sup> km <sup>-2</sup> |
| Forest<br>dominated<br>subwatershed       | 184             | 9.20         | 17.2      | 70.9   | 2.32  | 8.3                                |
| Agricultural<br>dominated<br>subwatershed | 272             | 70.7         | 10.2      | 10.2   | 6.77  | 0.76                               |
| Total<br>watershed                        | 456             | 45.8         | 13.1      | 34.9   | 4.97  | 3.8                                |

39

40

41 **S4**

42 Table S3: Gross primary production and associated nitrate uptake rates and velocities for the forest  
43 and agricultural reaches of the Selke river in 2011 and 2012

| Stream type<br>and year | GPP                                              | ER                                               | NO <sub>3</sub> -N | U <sub>a</sub>                       | V <sub>f</sub>    |
|-------------------------|--------------------------------------------------|--------------------------------------------------|--------------------|--------------------------------------|-------------------|
|                         | g O <sub>2</sub> m <sup>-2</sup> y <sup>-1</sup> | g O <sub>2</sub> m <sup>-2</sup> y <sup>-1</sup> | mg L <sup>-1</sup> | mg N m <sup>-2</sup> d <sup>-1</sup> | m d <sup>-1</sup> |
| Forest                  |                                                  |                                                  |                    |                                      |                   |
| 2011                    | 173                                              | -1081                                            | 1.32 (1.04)        | 12.6 (21.8)                          | 0.016 (0.029)     |
| 2012                    | 135                                              | -1522                                            | 1.62 (1.18)        | 8.98 (14.3)                          | 0.009 (0.014)     |
| Agricultural            |                                                  |                                                  |                    |                                      |                   |
| 2011                    | 670                                              | -1228                                            | 4.22 (0.46)        | 77.3 (67.1)                          | 0.018 (0.028)     |
| 2012                    | 804                                              | -1395                                            | 2.90 (0.64)        | 85.4 (67.4)                          | 0.034 (0.015)     |

44 GPP and ER is yearly sum, NO<sub>3</sub>-N is mean concentration, U<sub>a</sub> is mean daily N uptake rate and V<sub>f</sub> is  
45 mean daily N uptake velocity, standard deviations are in brackets

46

47 S5

48 Figure S2: Geographical location and digital elevation model of the Selke watershed

49

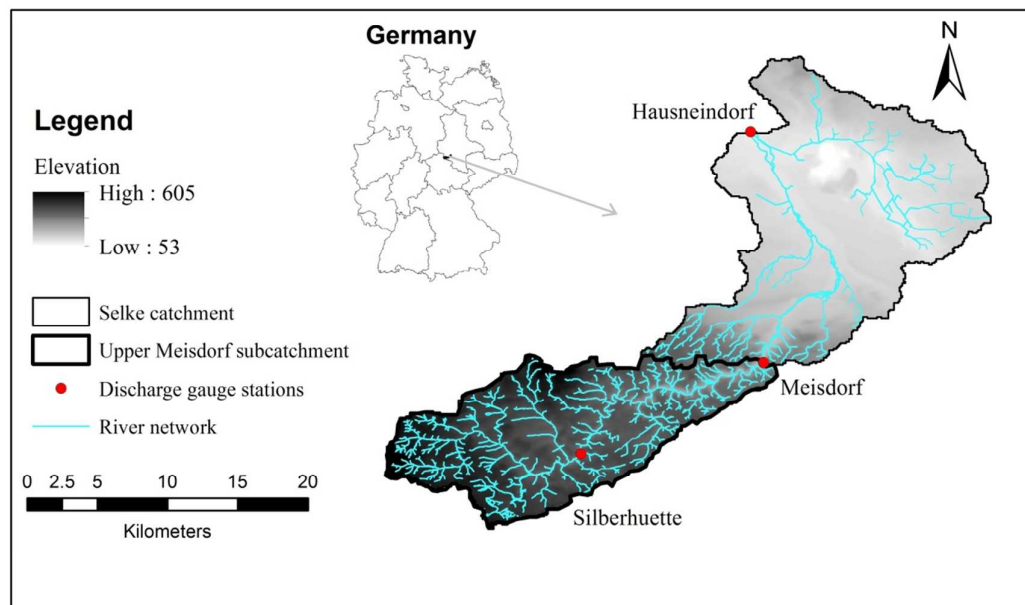

50

51

52    **S6**

53    Figure S3: Seasonal variability of selected constituents in the forest stream reach of the Selke River  
54    (station Meisdorf) from 01.01.2011 to 31.12.2012: a) discharge; b) NO<sub>3</sub>-N.; c) dissolved oxygen d) pH.

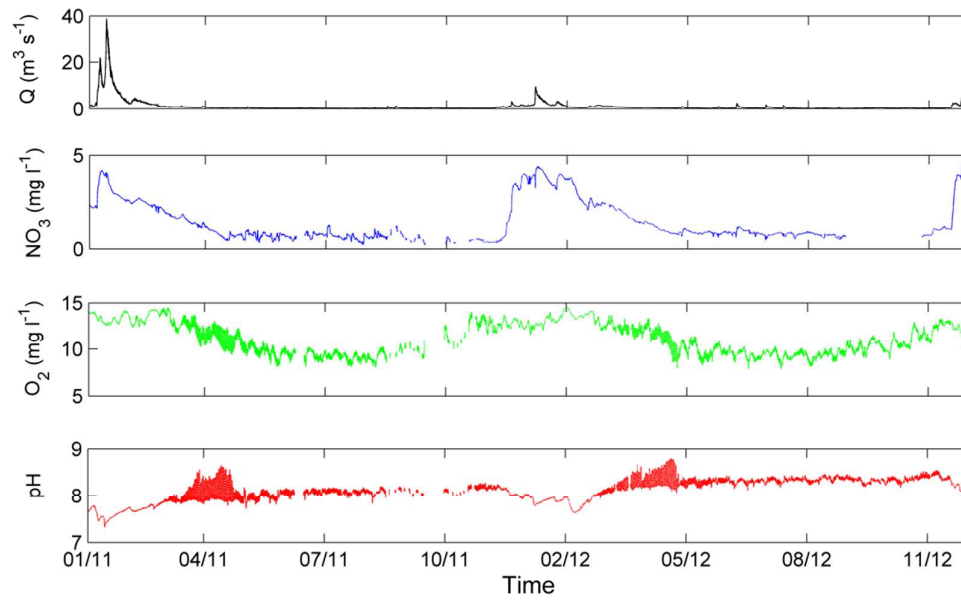

55

56

58 Figure S4: Daily rates of (a) gross primary production (GPP: black line) and b) ecosystem respiration  
59 (ER: negative values red line) measured in upper Selke river (Station Hausneindorf) from 1 January  
60 2011 to 31 December 2012

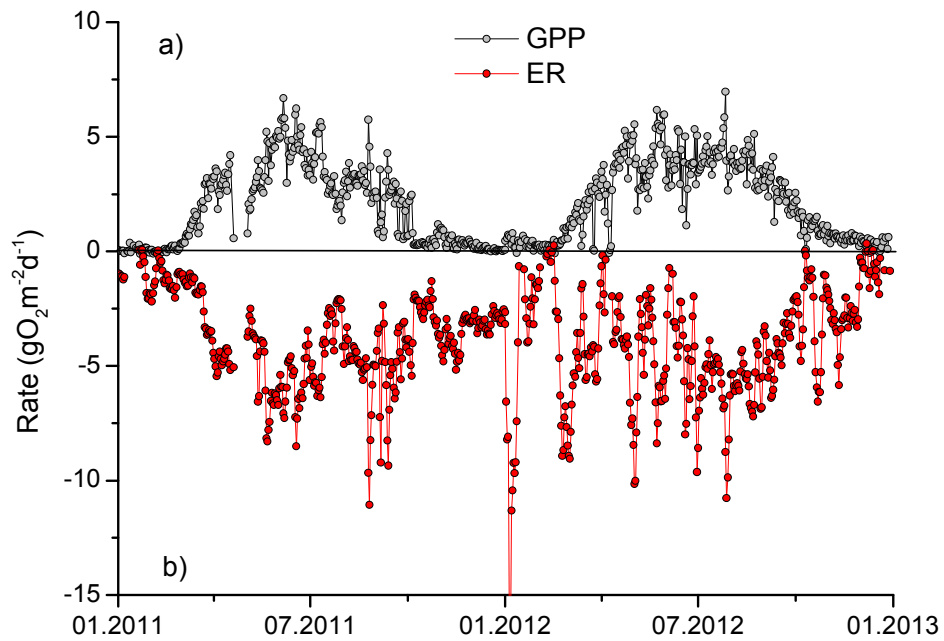

Supplement: Supplementary file 1 [file 5304670]
